# Supplementary material for: 1D core–shell magnetoelectric nanocomposites by template-assisted liquid phase deposition
Source: Royal Society of Chemistry journal article supplement (doi:10.1039/c7ce00101k), 2017-01-01
Supplement: c7ce00101k1.pdf [file c7ce00101k1.pdf]

Supporting Information for Manuscript CE-ART-01-2017-000101

## **1D Core-Shell Magnetoelectric Nanocomposites by Template-Assisted Liquid Phase Deposition**

Amin Yourdkhani<sup>1</sup>, Daniela Caruntu<sup>2</sup>, Melvin Vopson<sup>3</sup>, and Gabriel Caruntu<sup>2,4\*</sup>

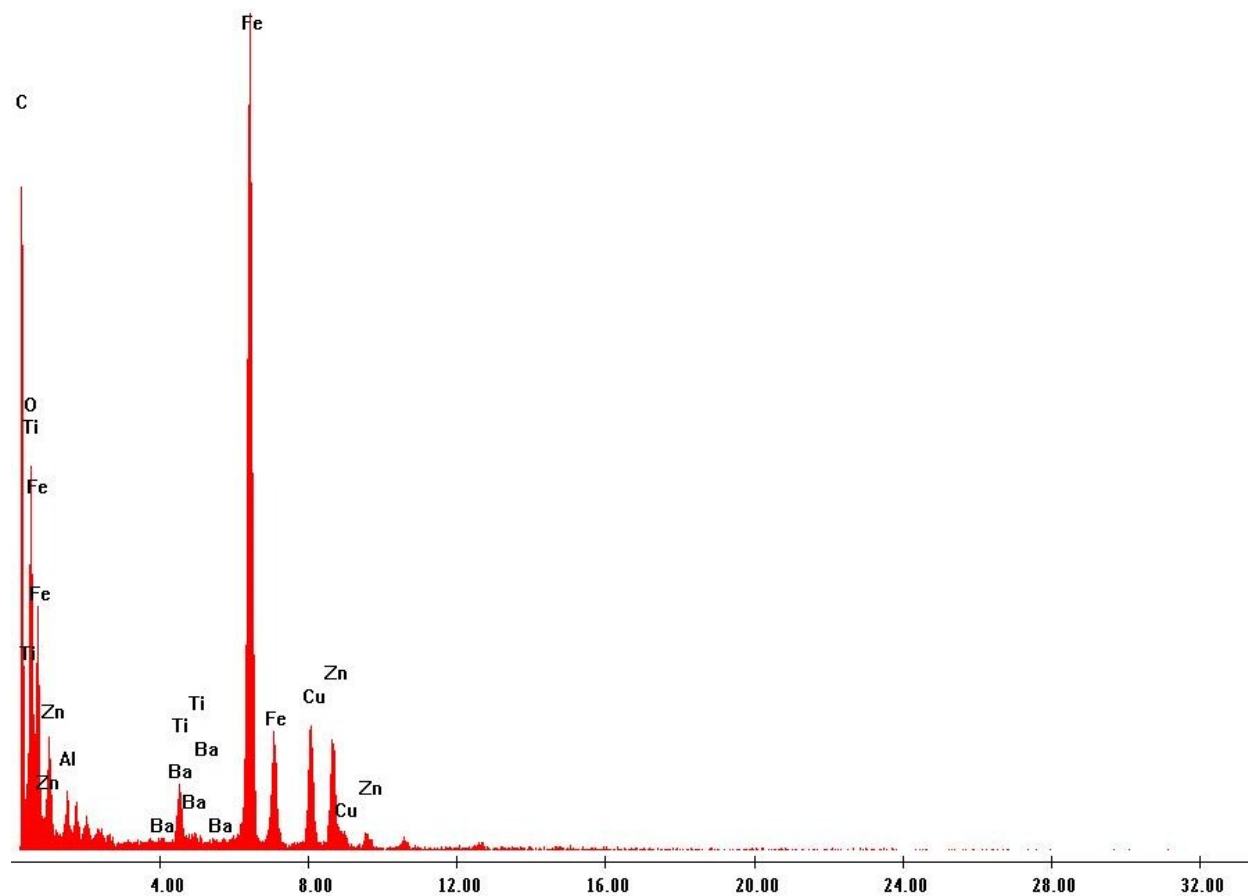

Figure S1. EDX Spectrum of the  $Zn_{1.5}Fe_{1.5}O_4$
